# Supplementary material for: Synthesis and characterization of nanoporous Bi3NbO7films: application to photoelectrochemical water splitting
Source: Royal Society of Chemistry journal article supplement (doi:10.1039/c3ra47118g), 2014-01-01
Supplement: c3ra47118g1.pdf [file c3ra47118g1.pdf]

## **Electronic Supplementary Information**

# **Synthesis and Characterization of Nanoporous Bi<sub>3</sub>NbO<sub>7</sub> Films: Application to Photoelectrochemical Water Splitting**

Jiangang Jiang<sup>a</sup>, Meng Wang<sup>a</sup>, Qingyun Chen<sup>\*a</sup>, Shaohua Shen<sup>a</sup>, Mingtao Li<sup>a</sup>, Liejin Guo<sup>a</sup>

*State Key Laboratory of Multiphase Flow in Power Engineering, The International Research Center of Renewable Energy, Xi'an Jiaotong University, Shaanxi 710049, P.R China E-mail:jjg2100@163.com*

## Optical characteristics

UV-vis absorption spectra in the wavelength region 300-800nm of  $\text{Bi}_3\text{NbO}_7$  films are shown in the Fig.S1. Fig. S1(a) shows the spectra of  $\text{Bi}_3\text{NbO}_7$  films deposited at 350°C, 375°C, 400°C, 425°C, 450°C and then annealed at 500°C for 2h. The band gap edges are determined to be distributed from 425 nm to 450 nm with increased deposition temperatures, from which the band gap energies of  $\text{Bi}_3\text{NbO}_7$  films distributed from 2.91eV to 2.75eV were calculated. Some researchers have reported that the optical absorption edges of  $\text{Bi}_3\text{NbO}_7$  powder displayed a red shift with increasing the deposition temperature, which could be assigned to the decrease of the crystal particle size.<sup>1</sup> Fig. S1(b) shows the UV-vis spectra of  $\text{Bi}_3\text{NbO}_7$  films with various thicknesses. There is no obvious difference of UV-vis spectra for  $\text{Bi}_3\text{NbO}_7$  films with various thicknesses, indicating that film thickness doesn't affect the film band gap energy.

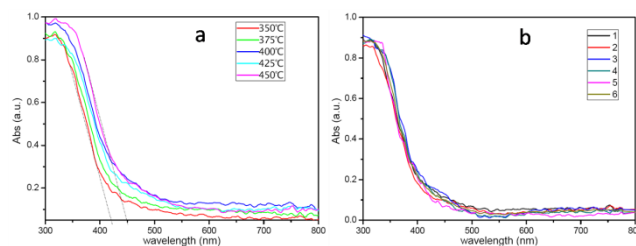

**Figure S1** UV-vis absorption spectra of  $\text{Bi}_3\text{NbO}_7$  films with (a) various deposition temperatures, (b) various thickness.

### Photoelectrochemical efficiency characteristics

The solar energy to chemical energy conversion efficiency known as photo-conversion efficiency ( $\eta$ ) of the as-prepared  $\text{Bi}_3\text{NbO}_7$  photoanode was calculated by the following equation<sup>2</sup>

$$\eta(\%) = \frac{\text{total power output} - \text{electrical input}}{\text{light power input}} = \frac{j_p[E_{rev}^0 - |E_{app}|]}{I_0} \times 100 \quad (1)$$

where  $j_p$  is the photocurrent density ( $\text{mA}/\text{cm}^2$ ),  $j_p E_{rev}^0$  is total energy output,  $j_p E_{app}$  is the total electrical energy input and  $I_0$  is the power density of incident light ( $\text{mW}/\text{cm}^2$ ).  $E_{rev}^0$  refers to the standard reversible potential of 1.23 V [vs. the normal hydrogen electrode (NHE)]. The applied potential is  $E_{app} = E_{means} - E_{aoc}$ , where  $E_{means}$  stands for the electrode potential vs. a saturated calomel electrode (SCE) of work electrode at which the photocurrent is measured under irradiation and  $E_{aoc}$  is the electrode potential (vs. SCE) of the same work electrode under open-circuit conditions under the same irradiation and in the same electrolyte<sup>2</sup>. As illustrated in Fig. S2, the solar to hydrogen efficiency of  $\text{Bi}_3\text{NbO}_7$  photoanode deposited with 3 times of repeating spray procedure at  $350^\circ\text{C}$  was calculated according to equation (1). The selected sample displayed a PEC efficiency of 0.0016% at 0.7 V vs. SCE, which could be assigned to the limited optical absorption ability of  $\text{Bi}_3\text{NbO}_7$  photoanodes that only responding to light with ultraviolet frequencies. As illustrated in the UV-vis absorption spectra (Fig. S1), the optical absorption edges of  $\text{Bi}_3\text{NbO}_7$  were located around 400 nm, indicating restricted proportion of solar spectrum ( $\sim 4\%$ ) could be utilized by as-prepared photoanodes. On the other hand, the fast recombination rate of the photo-induced carriers is believed another significant factor that limited the PEC performance of  $\text{Bi}_3\text{NbO}_7$  photoanodes<sup>3</sup>.

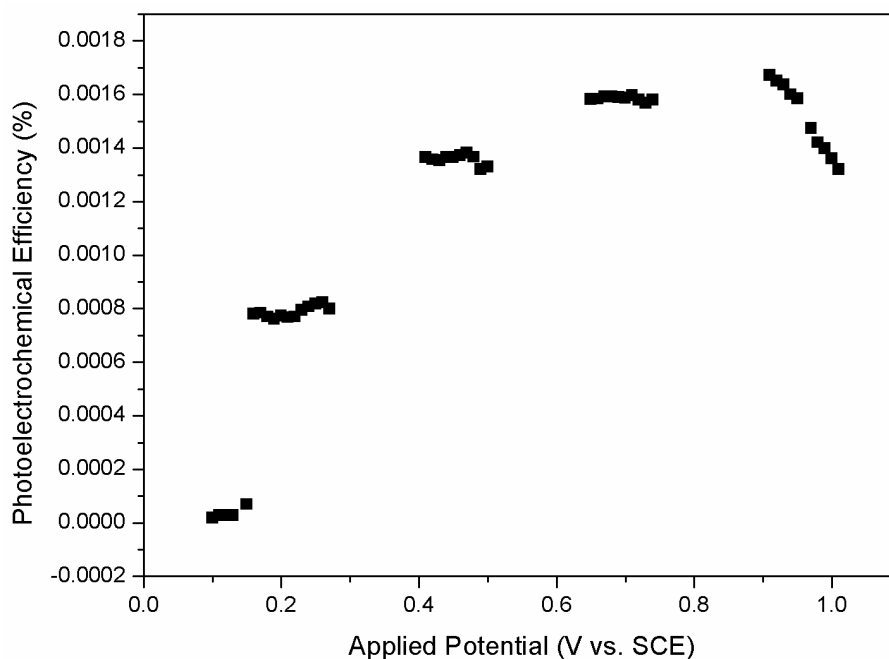

**Figure S2** PEC efficiency of  $\text{Bi}_3\text{NbO}_7$  photoanode deposited with 3 times of repeating spray procedure at  $350^\circ\text{C}$ , as a function of applied potential.

### References:

1. Zhou, H.-m.; Yi, D.-q.; Yu, Z.-m.; Xiao, L.-r.; Li, J., Preparation of aluminum doped zinc oxide films and the study of their microstructure, electrical and optical properties. *Thin Solid Films* **2007**, *515* (17), 6909-6914.

2. Li, X.; Hou, Y.; Zhao, Q.; Chen, G., Synthesis and Photoinduced Charge-Transfer Properties of a ZnFe<sub>2</sub>O<sub>4</sub>-Sensitized TiO<sub>2</sub> Nanotube Array Electrode. *Langmuir* **2011**, *27* (6), 3113-3120.
3. Hou, J.; Wang, Z.; Jiao, S.; Zhu, H., Bi<sub>2</sub>O<sub>3</sub> quantum-dot decorated nitrogen-doped Bi<sub>3</sub>NbO<sub>7</sub> nanosheets: in situ synthesis and enhanced visible-light photocatalytic activity. *CrystEngComm* **2012**, *14* (18), 5923-5928.
